# Supplementary material for: Genome-Wide Identification of DNA Methylases and Demethylases in Kiwifruit (Actinidia chinensis)
Source: Front Plant Sci. 2020 Sep 9;11:514993. doi: 10.3389/fpls.2020.514993 (PMC7509440; doi:10.3389/fpls.2020.514993)
Supplement: Supplementary file 2 [file Table_2.xlsx]

## Sheet: Genes
C5-MTase and demethylase genes identified in other species
Species	Protein name	Gene loci
Arabidopsis thaliana	AtMET1	At5g49160
	AtMET2a	At4g14140
	AtMET2b	At4g08990
	AtMET3	At4g13610
	AtDRM1	At5g15380
	AtDRM2	At5g14620
	AtCMT1	At1g80740
	AtCMT2	At4g19020
	AtCMT3	At1g69770
	AtROS1	At2g36490
	AtDME	At5g04560
	AtDML2	At3g10010
	AtDML3	At4g34060
Oryza sativa	OsMET1	LOC_Os03g58400
	OsMET2	LOC_Os07g08500
	OsCMT1	LOC_Os03g12570
	OsCMT2	LOC_Os05g13780
	OsCMT3	LOC_Os10g01570
	OsDRM1a	LOC_Os11g01810
	OsDRM2	LOC_Os03g02010
	OsROS1a	LOC_Os01g11900
	OsROS1b	LOC_Os02g29230
	OsROS1c	LOC_Os05g37350
	OsROS1d	LOC_Os05g37410
	OsDML3a	LOC_Os02g29380
	OsDML3b	LOC_Os04g28860
Solanum lycopersicum	SlMET	Solyc11g030600
	SlDRM1L	Solyc04g005250
	SlDRM1L1	Solyc10g078190
	SlDRM5	Solyc02g062740
	SlMET1L	Solyc01g006100
	SlMET3L	Solyc12g100330
	SlMETL	Solyc08g067070
	SlROS1L	Solyc09g009080
	SlDML	Solyc10g083630
	SlDML2	Solyc11g007580

## Sheet: Database
Species	Database link
Actinidia chinensis	https://www.ncbi.nlm.nih.gov/nuccore/NKQK00000000
Arabidopsis thaliana	http://www.plantgdb.org/AtGDB/
Solanum lycopersicum	http://www.plantgdb.org/SlGDB/
Oryza sativa	http://www.plantgdb.org/OsGDB/
