# Supplementary material for: Genome-Wide Identification of DNA Methylases and Demethylases in Kiwifruit (Actinidia chinensis)
Source: Front Plant Sci. 2020 Sep 9;11:514993. doi: 10.3389/fpls.2020.514993 (PMC7509440; doi:10.3389/fpls.2020.514993)
Supplement: Supplementary file 6 [file Table_6.xlsx]

## Sheet: Sheet1
Cis-acting regulatory elements of kiwi C5-MTases and demethylase gene promoters
Name	Class of promoter induce motif
	MeJA		Abscisic acid	Light		Anaerobic	Defense and stress	Cold	Meristem	Salicylic acid	Endosperm	Circadian control	Zein metabolism	Cell cycle	Gibberellin
	CGTCA-motif	TGACG-motif	ABRE	ACE	G-Box	ARE	TC-rich repeats	LTR	CAT-box	TCA-element	GCN4_motif	circadian	O2-site	MSA-like	TATC-box
CMT1	1	1	0	1	0	0	0	1	0	0	0	0	0	0	0
CMT2	0	0	0	0	0	0	0	1	0	0	1	0	0	0	1
CMT3	1	1	0	1	0	1	0	0	0	0	0	0	0	0	0
CMT4	1	0	1	0	0	0	0	0	0	0	0	0	0	0	0
CMT5	1	0	1	0	0	0	0	0	0	0	0	0	0	1	0
DRM2X1	1	0	0	0	0	1	1	0	0	0	0	0	0	0	0
DRM2X2	1	0	0	0	0	1	0	0	0	0	0	0	0	0	0
DRM2X3	0	1	0	0	0	1	1	0	0	0	0	0	0	0	0
MET	0	0	3	0	2	1	0	0	0	0	0	1	0	0	0
ROS1X1	0	2	4	0	0	2	1	0	1	0	0	0	0	0	0
ROS1X2	1	1	3	1	4	1	1	2	0	0	1	0	0	0	0
DML	1	0	0	0	1	0	1	0	0	0	0	0	0	0	0
DME1	0	1	1	0	1	2	1	0	0	1	0	0	0	0	0
DME2	2	2	3	0	0	1	0	1	1	0	0	0	0	0	0
DME3	1	1	0	0	0	1	0	0	0	1	0	1	1	0	0
DME4	3	1	3	0	1	2	0	0	1	0	0	0	0	0	0
